# Supplementary material for: Neutrophil-to-Lymphocyte, Monocyte-to-Lymphocyte, Platelet-to-Lymphocyte Ratio and Systemic Immune-Inflammatory Index in Different States of Bipolar Disorder
Source: MDPI journal article supplement (doi:10.3390/brainsci12081034), 2022-08-04
Supplement: s1 [file s1]

## Supplementary Materials

**Table S1- Supplementary materials** Prognostic accuracy of white blood cells, platelets and Inflammatory Ratios in patients (manic or depressive episode)

| Prognostic marker | Cut-off | Sensitivity | Specificity | PPV   | NPV   | AUC   | 95% CI      | Sig.  |
|-------------------|---------|-------------|-------------|-------|-------|-------|-------------|-------|
| Neutrophil        | 4.21    | 75.4%       | 36.9%       | 5.9%  | 96.6% | 0.500 | 0.414-0.586 | 0.998 |
| Monocyte          | 0.29    | 99.9%       | 0.9%        | 5.0%  | 99.4% | 0.431 | 0.345-0.518 | 0.518 |
| Lymphocyte        | 1.31    | 95.7%       | 7.2%        | 5.2%  | 97.0% | 0.441 | 0.356-0.526 | 0.171 |
| Platelet          | 233.5   | 62.5%       | 43.2%       | 5.5%  | 95.6% | 0.470 | 0.383-0.557 | 0.497 |
| NLR               | 1.43    | 92.8%       | 20.7%       | 5.8%  | 98.2% | 0.543 | 0.457-0.628 | 0.326 |
| MLR               | 0.16    | 97.1%       | 89.2%       | 32.1% | 99.8% | 0.480 | 0.394-0.566 | 0.644 |
| PLR               | 140.7   | 30.4%       | 79.3%       | 7.2%  | 95.6% | 0.525 | 0.438-0.612 | 0.577 |
| SII index         | 634.9   | 40.6%       | 69.7%       | 6.6%  | 95.7% | 0.524 | 0.437-0.612 | 0.583 |

PPV: Positive predictive value; NPV: Negative predictive value; AUC: area under the curve; CI: Confidence interval

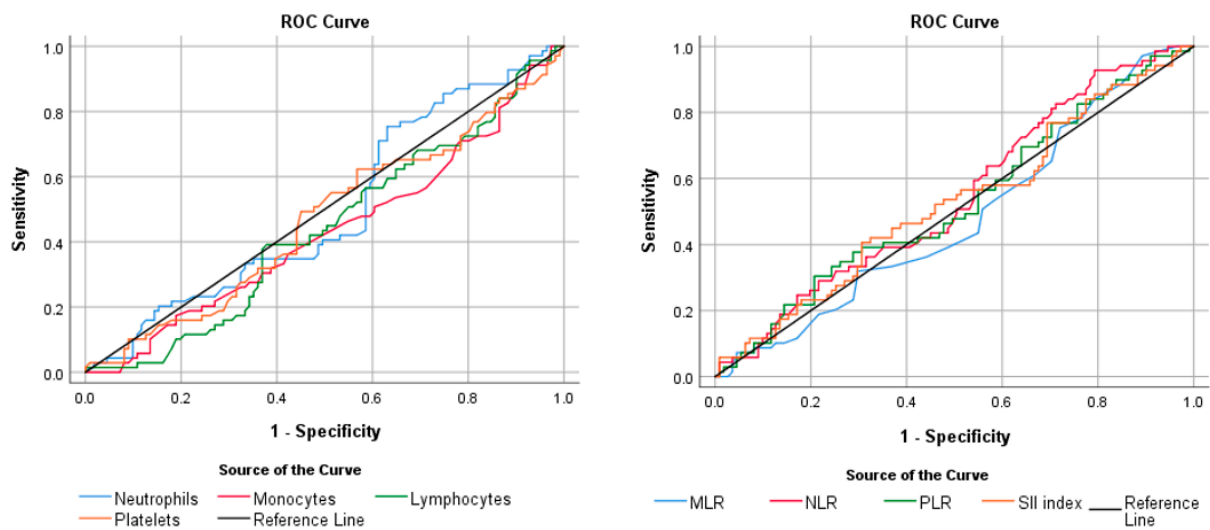

**Figure S1- Supplementary materials.** ROC curves of the of white blood cells, platelets (A) and Inflammatory Ratios (B) in patients (manic or depressive episode)
